# Supplementary material for: Resistance Analysis of Baseline and Treatment-Emergent Variants in Hepatitis C Virus Genotype 1 in the AVIATOR Study with Paritaprevir-Ritonavir, Ombitasvir, and Dasabuvir
Source: PubMed Central journal article supplement — Antimicrob Agents Chemother. 2015 Aug 14;59(9):5445–54. doi: 10.1128/AAC.00998-15 (PMC4538512; doi:10.1128/aac.00998-15), 2015-08-14
Supplement: AAC.00998-15_zac009154312so1.pdf [file AAC.00998-15_zac009154312so1.pdf]

**Table S1. AVIATOR 2D with RBV study design and treatment outcome**

|                                       | Arm | 2D Regimen <sup>a</sup><br>+ RBV | Paritaprevir<br>dose<br>mg <sup>a</sup> | SVR <sub>24</sub> |             | Virologic failures <sup>b</sup> (n) |    |         |    |
|---------------------------------------|-----|----------------------------------|-----------------------------------------|-------------------|-------------|-------------------------------------|----|---------|----|
|                                       |     |                                  |                                         | % (n/N)           |             | Breakthrough                        |    | Relapse |    |
|                                       |     |                                  |                                         | 1a                | 1b          | 1a                                  | 1b | 1a      | 1b |
| Treatment-naive                       | B   | Dasabuvir                        | 150                                     | 75.9 (22/29)      | 100 (12/12) | 1                                   |    | 3       |    |
|                                       | C   | Ombitasvir                       | 100                                     | 76.9 (20/26)      | 100 (13/13) |                                     |    | 6       |    |
|                                       | D   | Ombitasvir                       | 200                                     | 88.5 (23/26)      | 100 (14/14) | 1                                   |    | 1       |    |
| Treatment-experienced null-responders | J   | Ombitasvir                       | 200                                     | 80.8 (21/26)      | 100 (19/19) |                                     |    | 5       |    |

2D, paritaprevir/r + (ombitasvir or dasabuvir)

<sup>a</sup> The daily dose of paritaprevir (plus 100 mg of ritonavir) in each arm is indicated; ombitasvir = 25 mg once daily; dasabuvir = 400 mg twice daily; RBV = 1000 mg if the body was less than 75 kg or 1200 mg if body weight was 75 kg or more. The treatment duration was 12 weeks across all 2D arms.

<sup>b</sup> Patients not achieving SVR<sub>24</sub> due to non-virologic reasons, e.g. early discontinuations, missing SVR<sub>24</sub> data etc., are not considered as VFs.

**Table S2. RAVs relative to reference sequence in NS3, NS5A and NS5B at the time of VF in AVIATOR 2D with RBV arms**

| Study Population                      | Arm | GT | VF Type                | NS3               |                       | NS5A           |                  | NS5B     |            |
|---------------------------------------|-----|----|------------------------|-------------------|-----------------------|----------------|------------------|----------|------------|
|                                       |     |    |                        | Baseline          | Time of VF            | Baseline       | Time of VF       | Baseline | Time of VF |
| Treatment-naïve                       | B   | 1a | Relapse at PTW4        | none <sup>a</sup> | D168V                 | none           | nd               | none     | M414T      |
|                                       | B   | 1a | Breakthrough at Week 8 | none              | R155K + A156G         | none           | nd               | none     | D559N      |
|                                       | B   | 1a | D/C                    | none              | none                  | none           | nd               | none     | none       |
|                                       | B   | 1a | Relapse at PTW12       | none              | R155K, D168H/V        | none           | nd               | none     | none       |
|                                       | B   | 1a | Relapse at PTW2        | none              | Y56H + D168V/S        | none           | nd               | none     | none       |
|                                       | C   | 1a | Relapse at PTW2        | none              | D168V                 | none           | Q30R             | none     | nd         |
|                                       | C   | 1a | Relapse at PTW8        | none              | D168V                 | none           | M28T             | none     | nd         |
|                                       | C   | 1a | Relapse at PTW24       | NA                | D168V                 | NA             | Q30L + Y93H      | NA       | nd         |
|                                       | C   | 1a | Relapse at PTW4        | none              | D168V                 | M28M/V         | M28V             | none     | nd         |
|                                       | C   | 1a | Relapse at PTW24       | none              | none                  | none           | H58D             | none     | nd         |
|                                       | C   | 1a | Relapse at PTW2        | none              | D168A                 | none           | M28T, Q30R       | none     | nd         |
|                                       | D   | 1a | Breakthrough at Week 4 | none              | V36A/M + Y56H + D168V | M28T           | M28T/V           | none     | nd         |
|                                       | D   | 1a | Relapse at PTW2        | none              | V36A + D168V          | none           | Q30R             | none     | nd         |
|                                       | D   | 1a | D/C                    | none              | none                  | none           | M28V, L31V, H58D | none     | nd         |
| Treatment-experienced Null-responders | J   | 1a | Relapse at PTW2        | none              | Y56H + D168V          | M28M/V         | M28V             | none     | nd         |
|                                       | J   | 1a | Relapse at PTW2        | none              | D168V                 | none           | Q30R             | none     | nd         |
|                                       | J   | 1a | Relapse at PTW2        | none              | D168V/Y               | Q30Q/R, Y93Y/N | M28T, Q30R       | none     | nd         |
|                                       | J   | 1a | Relapse at PTW4        | none              | A156V + D168V         | none           | M28T             | none     | nd         |
|                                       | J   | 1a | Relapse at PTW4        | none              | D168V                 | none           | Q30R             | none     | nd         |

GT, genotype; D/C, premature study drug discontinuation; NA, sequence not available due to technical difficulties; nd, not determined as 2D regimen did not include drug target; PTW, Post-Treatment Week; VF, virologic failure; +, indicates linked variants; /, indicates mixture of variants

<sup>a</sup> none = variants at resistance-associated amino acid positions were not detected by clonal sequencing.
